# Supplementary material for: Toward IoT fog computing-enabled system energy consumption modeling and optimization by adaptive TCP/IP protocol
Source: PeerJ Comput Sci. 2021 Aug 5;7:e653. doi: 10.7717/peerj-cs.653 (PMC8356661; doi:10.7717/peerj-cs.653)
Supplement: Supplemental Information 1 [file peerj-cs-07-653-s001.xlsx]

## Sheet: Sheet2
ping
debit	2 Mbit/s	1 Mbit/s	0.5 Mbit/s
MTU = 500(472)
Interval -i (s)	1.47 / -f	3.27	6.87
rtt (min/avg ms)	2.918 / 3.36	2.920 / 3.35	2.928 / 3.35
Cons. Enrg. (%)	25	25	25
Temps	2335.16	2342.5	2357.58
Packet sent	701200	680000	390000
Packet recvd	701121	679905	389890
Temps / Cons. (s / 1%)	93.4064	93.7	94.3032
Taille Totale (Mbyte)	315.634	306.091	175.552
Max (Gbyte)	~1.22G	~1.20G	~0.69G
MTU = 1000 (972)
Interval -i (s)	3.03 / -f	6.74	14.16
rtt min/avg (ms)	4.444 / 5.00	4.444 / 5.02	4.436 / 4.90
Cons. Enrg. (%)	25	25	25
Temps	2290.25	2299.5	2310.57
Packet sent	445000	366000	164000
Packet recvd	444953	365944	163904
Temps / Cons. (s / 1%)	91.61	91.98	92.4228
Taille Totale (Mbyte)	412.502	339.272	152.023
Max (Gbyte)	~1.65G	~1.33G	~0.59G
MTU = 1500 (1472)
Interval -i (s)	4.59 / -f	10.21	21.44
rtt min/avg (ms)	5.981 / 6.65	5.967 / 6.70	5.987 / 6.55
Cons. Enrg. (%)	25	25	25
Temps	2245.71	2255.25	2267.12
Packet sent	341000	222000	102000
Packet recvd	340900	221952	101964
Temps / Cons. (s / 1%)	89.8284	90.21	90.6848
Taille Totale (Mbyte)	478.699	311.646	143.188
Max (Gbyte)	~1.86G	~1.22G	~0.56G
ftp
MTU (byte)	1500	1000	500
Data sent	1295M	978M	650M
cons. Enrg. (%)	25	25	25
Temps (s)	2106.54	2217.13	2281.75
Temps / Cons. (s / 1%)	84.2616	88.6852	91.27
speed (k/s)	614.7	451.7	291.9
Max (Gbyte)	~ 4.2G	~3.5G	~2.5G
Java
MTU (byte)	1500	1000	500
Data sent	1255M	960M	650M
cons. Enrg. (%)	25	25	25
Temps (s)	2110.51	2218.85	2285.71
Temps / Cons. (s / 1%)	84.4204	88.754	91.4284
speed (k/s)	608.914	443.04	291.201
Max (Gbyte)	~4.9G	~3.75G	~2.54G

## Sheet: Sheet3
bit rate	11Mb/s	1441792
d1	2Mb/s	262144
d2	1Mb/s	131072
d3	512Kb/s	65536
size	1472	972	472
d1 : -i	0.00459428	0.00303372	0.00147317		2Mb/s	262144
d2 : -i	0.0102095	0.00674161	0.0032737		1Mb/s	131072
d3 : -i	0.02144	0.0141574	0.00687478		512Kb/s	65536

## Sheet: Sheet5
S (silent) (ubat/s)	0.00725689	0.00725689	0.00725689
ftp
MTU	500	1000	1500
quantité (octets)	681574400	1006632960	1357905920		qf(m)
durée (s)	2285.75	2217.13	2106.54		df(m)
t(m) (ubat/octet)	1.23428e-08	8.85181e-09	7.15297e-09
ping
quantité (octets)	330966400	432540000	501952000		qp(m)
durée (s)	2335.16	2290.25	2245.71		dp(m)
r(m) (ubat/octet)	1.19919e-08	1.05219e-08	1.01856e-08
MTU	500	1000	1500
t(m) (ubat/octet)	1.23428e-08	8.85181e-09	7.15297e-09
r(m) (ubat/octet)	1.19919e-08	1.05219e-08	1.01856e-08
mtu = 1500
r(p)*p	r(m)	r(m)*r(p)*p
22606449	1.01856e-08	0.23026
t(p)*p	t(m)	t(m)*t(p)*p
1791511	7.15297e-09	0.0128146
	total (ubat)	0.243074
mtu = 1000
r(p)*p	r(m)	r(m)*r(p)*p
22741258	1.05219e-08	0.239281
t(p)*p	t(m)	t(m)*t(p)*p
1708848	8.85181e-09	0.0151264
	total (ubat)	0.254407
mtu = 500
r(p)*p	r(m)	r(m)*r(p)*p
23052520	1.19919e-08	0.276445
t(p)*p	t(m)	t(m)*t(p)*p
2030974	1.23428e-08	0.025068
	total (ubat)	0.301512
500	0.301512
1000	0.254407
1500	0.243074

## Sheet: Sheet6
mtu	FTP	JAVA	PING
1500	1357905920	1315962880	501952000
1000	1006632960	1006632960	432540000
500	681574400	681574400	330966400
mtu	FTP	JAVA	PING	silent
1500	2106.54	2110.51	2245.71	3445
1000	2217.13	2218.85	2290.25	3445
500	2285.75	2285.71	2335.16	3445
